# Supplementary material
Source: publisher site journal article supplement (https://www.dovepress.com/article/585519)

**SUPPLEMENTARY APPENDIX**

**Continuous Erector Spinae Plane Block Versus Thoracic Epidural Analgesia After Thoracotomy: A Randomized Controlled Assessor-Blinded Non-Inferiority Trial**

Sooah Cho1, Ho-Jin Lee1,2, Soo-hyuk Yoon1,2, Sang-Youn Park1, Samina Park3,4, Hyun Joo Lee3,4, In Kyu Park3,4, Chang Hyun Kang3,4, Kwon Joong Na3,4,5*, Susie Yoon1,2*, Young Tae Kim3,4,5, and Jaehyon Bahk1,2

1Department of Anesthesiology and Pain Medicine, Seoul National University Hospital, Seoul, Republic of Korea

2Department of Anesthesiology and Pain Medicine, Seoul National University College of Medicine, Seoul, Republic of Korea

3Department of Thoracic and Cardiovascular Surgery, Seoul National University Hospital, Seoul, Republic of Korea

4Department of Thoracic and Cardiovascular Surgery, Seoul National University College of Medicine, Seoul, Republic of Korea

5Cancer Research Institute, Seoul National University College of Medicine, Seoul, Republic of Korea

***Corresponding Authors:**

Kwon Joong Na

Address: Department of Thoracic and Cardiovascular Surgery, Seoul National University Hospital; Department of Thoracic and Cardiovascular Surgery, Seoul National University College of Medicine; Cancer Research Institute, Seoul National University College of Medicine, 101 Daehak-ro, Jongno-gu, Seoul 03080, Republic of Korea

Phone: 82-2-2072-2347

E-mail: kjna85@gmail.com

Susie Yoon

Address: Department of Anesthesiology and Pain Medicine, Seoul National University Hospital; Department of Anesthesiology and Pain Medicine, Seoul National University College of Medicine, 101 Daehak-ro, Jongno-gu, Seoul 03080, Republic of Korea

Phone: 82-2-2072-7361

E-mail: susiey@snu.ac.kr

**TABLE OF CONTENTS**

[Supplementary Methods 1 : Perioperative Management 1](#_Toc225509849)

[Supplementary Methods 2 : Post-hoc power analysis 3](#_Toc225509850)

[Supplementary Methods 3: Bayesian analysis 4](#_Toc225509851)

[Supplementary Methods 4: Statistical Analysis Plan 6](#_Toc225509852)

[Table S1. Baseline Characteristics (Per protocol population) 6](#_Toc225509853)

[Table S2. Comparison of postoperative pain score and need of rescue analgesics at each time point (Per protocol population) 7](#_Toc225509854)

[Table S3. Comparison of postoperative pain score at each time point using Mann-Whitney U test 8](#_Toc225509855)

[Table S4A. Rescue Analgesic Consumption (Modified intention-to-treat population) 9](#_Toc225509856)

[Table S4B. Rescue Analgesic Consumption (Per-protocol population) 10](#_Toc225509857)

[Table S5. Postoperative secondary outcomes and recovery parameters (Per protocol population) 11](#_Toc225509858)

[Table S6. Attrition Sensitivity Analyses for 3- and 6-Month Outcomes (mITT Population) 12](#_Toc225509859)

[Table S7. Post-hoc Power Analysis for Non-inferiority Trial 13](#_Toc225509860)

[Table S8. Bayesian Analysis of Non-inferiority 14](#_Toc225509861)

[Figure S1. Resting pain scores over time in Per Protocol population. 16](#_Toc225509862)

# Supplementary Methods 1 : Perioperative Management

**Anesthesia Induction and Maintenance**

All patients followed standardized preoperative protocols in accordance with institutional guidelines.. No premedication was administered. Anesthesia induction was performed using propofol, remifentanil, and rocuronium for neuromuscular blockade. To prevent postoperative nausea and vomiting (PONV), prophylactic antiemetics consisting of palonosetron 0.075 mg and dexamethasone 5 mg were administered intravenously during induction.

Anesthesia was maintained using total intravenous anesthesia (TIVA) with target-controlled infusion of propofol and remifentanil. Anesthetic depth was monitored and maintained using the Bispectral Index (BIS) between 40–60 throughout the procedure.

Comprehensive intraoperative monitoring included invasive arterial blood pressure monitoring, urinary output measurement, and esophageal temperature monitoring to maintain normothermia. Fluid management followed a near-zero fluid balance strategy guided by hemodynamic parameters and urine output. Lung protective ventilation strategies were employed, with tidal volumes adjusted to 6–8 mL/kg of ideal body weight during two-lung ventilation and 4–6 mL/kg during one-lung ventilation. Positive end-expiratory pressure (PEEP) was maintained at 5–10 cmH2O.

**Surgical Technique**

All surgical procedures were performed via open posterolateral thoracotomy following institutional standardized protocols. A posterolateral incision of approximately 20 cm was made through the fifth intercostal space, with preservation of the serratus anterior muscle to minimize postoperative morbidity and preserve shoulder function.

Following thoracotomy and lung isolation, systematic exploration of the pleural cavity was performed to assess resectability and staging. Complete mediastinal lymph node dissection was performed as institutional standard in all cases. The specific type of anatomical resection (lobectomy, sleeve lobectomy, bilobectomy, or pneumonectomy) was determined based on tumor location, extent of disease, cardiopulmonary reserve, and intraoperative assessment of technical feasibility. Following completion of the resection and lymphadenectomy, hemostasis was ensured, and chest tubes were placed for drainage. The thoracotomy was closed in anatomical layers with careful attention to intercostal nerve preservation when possible.

**Emergence and Recovery**

Ten minutes before surgical completion, acetaminophen 1g (Profa infusion injection, Daehan Pharmaceutical Co., Ltd.) was administered intravenously to all patients in both groups. Neuromuscular blockade was reversed using sugammadex (2–4 mg/kg) at the conclusion of surgery. Patients were extubated in the operating room and transferred to the post-anesthesia care unit (PACU) for monitoring and initial postoperative care.

**Standardization**

All perioperative management protocols were standardized across both study groups to ensure that any observed differences in pain outcomes could be attributed to the analgesic intervention rather than variations in perioperative care. The same anesthesia and surgical teams were involved throughout the study period to minimize inter-provider variability.

# Supplementary Methods 2 : Post-hoc power analysis

**Rationale**

Post-hoc power analysis was conducted to assess the statistical power achieved with the actual sample size and observed variability in our study. This provides context for interpreting study findings and planning future research.

**Methodology**

**Original Sample Size Calculation**

The original sample size calculation was based on:

- Non-inferiority margin (Δ): 2.0 points on the 0-10 NRS pain scale
- Assumed standard deviation: 3.0 points (based on previous literature and institutional experience)
- Target power: 80% with one-sided alpha = 0.05
- Required sample size: 56 patients (28 per group)

**Post-hoc Power Calculation**

Post-hoc power was calculated using the observed variability from the actual study data:

- Achieved sample size: 44 patients (ESPB n=23, TEA n=21)
- Observed pooled standard deviation: 1.86 points
- Effect size for non-inferiority margin: Δ/pooled SD = 2.0/1.86 = 1.077

Power calculations were performed using the pwr package in R. The observed standard deviation (1.86) was substantially lower than assumed (3.0), representing a 38% reduction in variability. This lower-than-expected variability partially mitigated the impact of reduced sample size, resulting in achieved power of approximately 65% compared to the target 80%.

**Interpretation**

The study achieved approximately 65% power to detect the non-inferiority margin of 2.0 points, representing 81% of the target power. While this confirms the trial is underpowered, the convergence of frequentist confidence intervals, Bayesian posterior probabilities, and sensitivity analyses all pointing toward the same conclusion provides reassurance about the robustness of findings despite the underpowered design.

**Limitations**

We acknowledge well-documented limitations of post-hoc power calculations (Hoenig and Heisey, 2001). However, post-hoc power based on observed variability (rather than observed treatment effect) provides useful information for understanding why the study was underpowered and planning future trials.

# Supplementary Methods 3: Bayesian analysis

**Rationale**

Bayesian analysis was performed to complement the frequentist non-inferiority test and provide probabilistic interpretation of treatment effects. Unlike frequentist hypothesis testing, Bayesian inference directly quantifies the probability of different parameter values given the observed data, which is particularly valuable in underpowered studies.

**Statistical Framework**

**Model Specification**

We fit a Bayesian linear regression model for the primary outcome (resting NRS pain score on postoperative day 1):

**Model**: NRS_POD1 ~ Normal(μ, σ), where μ = β₀ + β₁ × Treatment

β₀ = intercept (mean pain score in TEA group)

β₁ = treatment effect (ESPB minus TEA)

σ = residual standard deviation

**Prior Distributions**

We specified weakly informative priors that allow data to predominantly drive inference while maintaining plausible bounds:

- Treatment effect (β₁): Normal(0, 5) - no prior preference, wide range
- Residual SD (σ): Half-Cauchy(0, 5) - standard prior for scale parameters
- Intercept (β₀): Normal(5, 5) - centered on mid-range of 0-10 NRS scale

These priors constrain parameters to physiologically plausible ranges without strongly influencing the posterior distribution.

**MCMC Sampling**

Analysis was conducted using the brms package (version 2.20.1) in R with Stan as the backend sampler:

- 4 parallel MCMC chains
- 4,000 iterations per chain (2,000 warmup, 2,000 sampling)
- Total: 8,000 posterior samples

**Convergence Assessment**

Model convergence was assessed using:

- R̂ statistics (Gelman-Rubin): All parameters R̂ = 1.00 (excellent convergence)
- Effective Sample Size (ESS): All parameters ESS > 3,500 (adequate independent samples)
- Trace plots: Visual confirmation of good mixing and stationarity
- Posterior predictive checks: Model adequately captured observed data

**Sensitivity Analysis**

Robustness to prior specification was tested using four alternative priors:

1. Weakly informative: Normal(0, 5) - primary analysis
2. More informative: Normal(0, 2)
3. Less informative: Normal(0, 10)
4. Skeptical prior: Normal(2, 3) - centered at non-inferiority margin

Results were consistent across all prior specifications (posterior probability of non-inferiority >98% in all cases), indicating conclusions are data-driven rather than prior-driven.

**Key Outputs**

From the posterior distribution, we calculated:

- Posterior mean and 95% credible interval for treatment difference
- Posterior probability that ESPB is non-inferior (P(difference < 2.0))
- Posterior probabilities for other clinically relevant thresholds

**Interpretation**

Bayesian credible intervals provide direct probability statements about parameters (e.g., "95% probability the true difference lies in this interval"), which is more intuitive than frequentist confidence intervals. The near-identity of Bayesian credible intervals and frequentist confidence intervals demonstrates convergence of both approaches with weakly informative priors and moderate sample size.

# Supplementary Methods 4: Statistical Analysis Plan

**1. Study Design**

Single-center, prospective, randomized, assessor-blinded, non-inferiority trial comparing continuous erector spinae plane block (ESPB) versus thoracic epidural analgesia (TEA) for postoperative pain control after thoracotomy.

**2. Analysis Populations**

- **Modified intention-to-treat (mITT) population**: All randomized patients who received the allocated intervention and had at least one postoperative pain assessment. This was the primary analysis population.
- **Per-protocol (PP) population**: All mITT patients who completed the study without major protocol violations. Major protocol violations included catheter failure requiring removal or conversion to alternative analgesia within 72 hours, and failure to complete primary outcome assessment. Per ICH E9 guidance, both mITT and PP analyses are reported for non-inferiority trials, with concordance between the two supporting robustness of findings.

**3. Primary Endpoint Analysis**

- **Endpoint**: Resting NRS pain score on postoperative day 1, defined as the higher of the morning and afternoon measurements.
- **Hypothesis**: H0: μESPB − μTEA ≥ Δ (ESPB is inferior) vs. H1: μESPB − μTEA < Δ (ESPB is non-inferior), where Δ = 2.0 points on the 0–10 NRS.
- **Significance level**: One-sided α = 0.05, consistent with the prospectively registered protocol and sample size calculation.
- **Method**: The between-group difference (ESPB minus TEA) and its two-sided 95% confidence interval were calculated. Non-inferiority was concluded if the upper bound of the 95% CI was below the pre-specified margin of 2.0 points. The use of the 95% CI rather than the 90% CI that formally corresponds to one-sided α = 0.05 represents a more conservative reporting approach.
- **Sample size**: Calculated using SampleSize4ClinicalTrials package in R, assuming one-sided α = 0.05, 80% power, non-inferiority margin Δ = 2.0, and standard deviation = 3.0, yielding 28 patients per group (56 total). With an anticipated dropout rate of approximately 24%, the target enrollment was set at 74 patients (37 per group).

**4. Secondary Endpoint Analyses**

All secondary analyses were two-sided with a significance level of 0.05. No adjustment for multiple comparisons was applied, as secondary analyses were considered exploratory.

- **Continuous variables**: Assessed for normality using the Shapiro-Wilk test. Normally distributed data were compared using Student’s t-test and presented as mean ± standard deviation. Non-normally distributed data were compared using the Mann-Whitney U test and presented as median [interquartile range].
- **Categorical variables**: Compared using the chi-square test or Fisher’s exact test as appropriate, and presented as frequencies and percentages.
- **Secondary pain-related outcomes**
  - Resting NRS pain scores on POD 2 and 3 (higher of morning/afternoon)
  - Movement-associated NRS pain scores on POD 1, 2, and 3
  - Maximum NRS pain score within each 24-hour postoperative period
  - Total rescue opioid consumption (POD 1–3), converted to oral morphine equivalents (OME)
- **Recovery-related outcomes**
  - Quality of Recovery-15K (QoR-15K) scores on POD 3
  - Duration of urinary catheter placement
  - Chest tube drainage duration
  - ICU admission and length of stay
  - Hospital length of stay
  - Postoperative complications (Clavien–Dindo classification)
- **Chronic pain outcomes**
  - painDETECT questionnaire scores at 3 and 6 months postoperatively
  - Use of analgesic medications at 3 and 6 months
- **Safety outcomes**
  - Adverse events: hypotension, nausea, vomiting, sedation, respiratory depression, urinary retention
  - Technical complications: catheter dislodgement, migration, infection

**5. Sensitivity Analyses**

- **Per-protocol analysis**: The primary non-inferiority analysis was repeated in the PP population to confirm robustness.
- **Post-hoc power analysis**: Post-hoc power was calculated using the observed pooled standard deviation and the achieved sample size (Supplementary Methods 2).
- **Bayesian analysis**: A Bayesian linear regression model was fitted to provide probabilistic inference complementary to the frequentist analysis. Posterior probability of non-inferiority (P[difference < Δ]) was the key metric (Supplementary Methods 3).
- **Attrition sensitivity analysis for 3- and 6-month outcomes**: To assess the robustness of chronic pain outcomes to loss to follow-up, three sensitivity approaches were applied:

(1) Complete-case analysis (primary): included only patients with available follow-up data.

(2) Best-case/worst-case scenario analysis: for continuous outcomes (painDETECT scores), missing ESPB values were imputed with the lowest (best-case) or highest (worst-case) observed score across all patients, and vice versa for TEA. For binary outcomes (analgesic use), missing ESPB values were imputed as no use (best-case) or use (worst-case), and vice versa for TEA.

(3) Mean imputation: missing continuous values were replaced with the group-specific observed mean.

Additionally, baseline characteristics (age, BMI, operative time, preoperative QoR-15K, and group allocation) were compared between completers and non-completers to evaluate potential attrition bias.

**6. Missing Data**

For the primary and secondary outcomes during the first three postoperative days, missing data were handled using available case analysis without imputation. For the 3- and 6-month chronic pain outcomes, attrition sensitivity analyses were performed as described in Section 5 to evaluate the potential impact of loss to follow-up. The extent of missing data is reported at each study stage in the CONSORT flow diagram (Figure 1).

**7. Software**

All analyses were performed using R software (version 4.3.0; R Foundation for Statistical Computing, Vienna, Austria) with the following packages: brms (version 2.20.1) for Bayesian analysis, pwr for post-hoc power analysis, and SampleSize4ClinicalTrials for sample size calculation. Additional analyses were performed using SPSS (version 25.0; IBM Corp., Armonk, NY, USA).

**8. Summary of Significance Levels**

| **Analysis** | **Sidedness** | **α level** | **Reporting** |
| --- | --- | --- | --- |
| Primary NI test | One-sided | 0.05 | 95% CI upper bound vs. Δ (conservative) |
| Sample size calculation | One-sided | 0.05 | n = 28 per group |
| Secondary/exploratory | Two-sided | 0.05 | P-value |
| Safety endpoints | Two-sided | 0.05 | P-value |

**Note**: The 95% CI approach for the primary NI test is more conservative than the 90% CI that formally corresponds to one-sided α = 0.05. This conservative choice strengthens the non-inferiority conclusion.

# Table S1. Baseline Characteristics (Per protocol population)

|  | **ESPB Group (n=20)** | **TEA Group (n=20)** |
| --- | --- | --- |
| Sex, male | 17 (85.0%) | 18 (90.0%) |
| Age, years | 66.6 (9.3) | 67.0 (8.3) |
| Height, cm | 165.0 (5.8) | 166.8 (6.1) |
| Weight, kg | 66.1 (7.1) | 65.9 (9.7) |
| BMI, kg m-2 | 24.3 (2.3) | 23.6 (3.1) |
| Preoperative smoking status |  |  |
| Non-smoker | 5 (25.0%) | 3 (15.0%) |
| Ex-smoker | 11 (55.0%) | 14 (70.0%) |
| Current | 4 (20.0%) | 3 (15.0%) |
| Preoperative FEV1, L | 2.6 (0.5) | 2.3 (0.5) |
| ASA physical status, II/III | 17 (85.0%)/3(15.0%) | 16 (80.0%)/4(20.0%) |
| Preoperative QoR-15K (0–150) | 143.4 (8.4) | 141.0 (14.1) |
| Type of operation |  |  |
| Lobectomy | 10 (50.0%) | 6 (30.0%) |
| Sleeve Lobectomy | 4 (20.0%) | 6 (30.0%) |
| Bilobectomy | 4 (20.0%) | 1 (5.0%) |
| Pneumonectomy | 2 (10.0%) | 7 (35.0%) |
| Operation time, min | 179.8 (43.7) | 183.5 (67.4) |
| Anesthesia time, min | 222.7 (42.7) | 228.4 (70.4) |

The data are expressed as either the mean (standard deviation), or as a count (percentage). ESPB, erector spinae plane block; TEA, thoracic epidural analgesia; BMI, body mass index; ASA, American Society of Anesthesiologists; QoR-15K, Korean version of the Quality of Recover-15.

# Table S2. Comparison of postoperative pain score and need of rescue analgesics at each time point (Per protocol population)

| **Pain Outcomes** | **ESPB Group (n=20)** | **TEA Group (n=20)** | **Mean difference**  **(95%% CI)** | ***P*-value** |
| --- | --- | --- | --- | --- |
| **POD 1** |  |  |  |  |
| NRS at rest | 4.10 (1.94) | 4.65 (1.66) | -0.55 (-1.71, 0.61) | 0.343 |
| NRS with movement | 6.10 (2.13) | 6.75 (1.45) | -0.65 (-1.82, 0.52) | 0.266 |
| NRS maximum | 6.80 (1.40) | 7.25 (1.37) | -0.45 (-1.34, 0.44) | 0.311 |
| Rescue Opioids OME, mg | 8.9 (11.6) | 2.9 (4.5) | 6.0 (0.3, 11.7) | 0.068 |
| **POD 2** |  |  |  |  |
| NRS at rest | 3.65 (1.87) | 3.70 (1.59) | -0.05 (-1.16, 1.06) | 0.928 |
| NRS with movement | 6.15 (1.90) | 5.80 (1.99) | 0.35 (-0.90, 1.60) | 0.573 |
| NRS maximum | 6.45 (1.85) | 5.85 (1.84) | 0.60 (-0.58, 1.78) | 0.311 |
| Rescue Opioids OME, mg | 4.1 (10.2) | 4.6 (9.9) | -0.5 (-6.9, 5.9) | 0.957 |
| **POD 3** |  |  |  |  |
| NRS at rest | 2.85 (1.76) | 2.95 (1.32) | -0.10 (-1.10, 0.90) | 0.84 |
| NRS with movement | 5.10 (2.05) | 5.00 (1.56) | 0.10 (-1.07, 1.27) | 0.863 |
| NRS maximum | 5.35 (1.73) | 5.37 (1.74) | -0.02 (-1.19, 1.16) | 0.979 |
| Rescue Opioids OME, mg | 3.0 (5.7) | 3.3 (7.3) | -0.3 (-4.5, 3.9) | 0.986 |
| Total (POD 1 to 3) rescue Opioids OME, mg | 16.0 (20.8) | 10.8 (16.2) | 5.2 (-6.8, 17.2) | 0.422 |

Data are presented as the mean (standard deviation). ESPB, erector spinae plane block; TEA, thoracic epidural analgesia; POD, postoperative day; NRS, numeric rating scale; OME, oral morphine equivalents.

# Table S3. Comparison of postoperative pain score at each time point using Mann-Whitney U test

| **Pain Outcomes** | **ESPB Group (n=23)** | **TEA Group (n=21)** | **Median difference (95%% CI)** | ***P*-value** |
| --- | --- | --- | --- | --- |
| **Modified intention-to-treat population** | | | | |
| **POD 1** |  |  |  |  |
| NRS at rest | 5.0 [2.5–5.0] | 4.0 [3.0–6.0] | 0.00 (-2.00, 2.00) | 0.423 |
| NRS with movement | 6.0 [5.8–8.0] | 7.0 [6.0–8.0] | 1.00 (-1.00, 2.00) | 0.268 |
| NRS maximum | 7.0 [6.0–8.0] | 8.0 [7.0–8.0] | 1.00 (0.00, 2.00) | 0.166 |
| **POD 2** |  |  |  |  |
| NRS at rest | 3.0 [2.0–5.0] | 4.0 [2.0–5.0] | 0.00 (-1.50, 2.00) | 0.943 |
| NRS with movement | 6.0 [5.0–8.0] | 6.0 [4.0–7.0] | -0.50 (-2.50, 2.00) | 0.569 |
| NRS maximum | 6.5 [5.0–8.0] | 6.0 [4.0–7.2] | -1.00 (-3.00, 1.00) | 0.337 |
| **POD 3** |  |  |  |  |
| NRS at rest | 3.0 [1.5–4.0] | 3.0 [2.0–3.0] | 0.00 (-1.00, 1.00) | 0.791 |
| NRS with movement | 5.0 [3.8–6.0] | 5.5 [3.8–6.0] | 0.50 (-1.00, 2.00) | 0.923 |
| NRS maximum | 5.0 [4.0–7.0] | 5.0 [4.0–6.5] | 0.00 (-2.00, 2.00) | >0.999 |
| **Per-protocol population** | **(n=20)** | **(n=20)** |  |  |
| **POD 1** |  |  |  |  |
| NRS at rest | 5.0 [2.0–5.0] | 4.0 [3.0–6.0] | -0.50 (-2.00, 2.00) | 0.474 |
| NRS with movement | 6.0 [5.8–8.0] | 7.0 [6.0–8.0] | 1.00 (-1.00, 2.00) | 0.382 |
| NRS maximum | 7.0 [6.0–8.0] | 8.0 [6.8–8.0] | 1.00 (0.00, 2.00) | 0.245 |
| **POD 2** |  |  |  |  |
| NRS at rest | 3.5 [2.0–5.0] | 4.0 [2.0–5.0] | 0.00 (-2.00, 2.00) | 0.868 |
| NRS with movement | 6.0 [5.0–8.0] | 6.0 [4.0–7.2] | 0.00 (-2.49, 2.00) | 0.631 |
| NRS maximum | 6.5 [5.0–8.0] | 6.0 [4.0–7.2] | -1.00 (-2.50, 1.50) | 0.337 |
| **POD 3** |  |  |  |  |
| NRS at rest | 3.0 [1.0–4.0] | 3.0 [2.0–3.2] | 0.00 (-1.00, 1.50) | 0.667 |
| NRS with movement | 5.0 [3.8–6.0] | 5.5 [3.8–6.0] | 0.50 (-1.50, 2.00) | 0.923 |
| NRS maximum | 5.0 [4.0–7.0] | 5.0 [4.0–6.5] | 0.00 (-2.00, 2.00) | >0.999 |

Data are presented as median [interquartile range]. ESPB, erector spinae plane block; TEA, thoracic epidural analgesia; POD, postoperative day; NRS, numeric rating scale.

# **Table S4A.** Rescue Analgesic Consumption (Modified intention-to-treat population)

| **Outcome** | **ESPB group (n=23)** | **TEA group (n=21)** | **P-value** |
| --- | --- | --- | --- |
| **POD 1** |  |  |  |
| Any rescue, n (%) | 16 (69.6) | 13 (61.9) | 0.752 |
| Opioid rescue, n (%) | 12 (52.2) | 7 (33.3) | 0.239 |
| Non-opioid rescue, n (%) | 10 (43.5) | 12 (57.1) | 0.547 |
| **POD 2** |  |  |  |
| Any rescue, n (%) | 7 (30.4) | 8 (38.1) | 0.752 |
| Opioid rescue, n (%) | 6 (26.1) | 5 (23.8) | >0.999 |
| Non-opioid rescue, n (%) | 4 (17.4) | 4 (19.0) | >0.999 |
| **POD 3** |  |  |  |
| Any rescue, n (%) | 7 (30.4) | 9 (42.9) | 0.533 |
| Opioid rescue, n (%) | 5 (21.7) | 5 (23.8) | >0.999 |
| Non-opioid rescue, n (%) | 2 (8.7) | 4 (19.0) | 0.403 |
| **Total (POD 1 to 3)** |  |  |  |
| Any rescue, n (%) | 17 (73.9) | 17 (81.0) | 0.724 |
| Opioid rescue, n (%) | 14 (60.9) | 11 (52.4) | 0.761 |
| Non-opioid rescue, n (%) | 13 (56.5) | 15 (71.4) | 0.360 |

Data are presented as n (%) or mean (SD). ESPB, erector spinae plane block; TEA, thoracic epidural analgesia; POD, postoperative day; OME, oral morphine equivalents.

# **Table S4B.** Rescue Analgesic Consumption (Per-protocol population)

| **Outcome** | **ESPB group (n=20)** | **TEA group (n=20)** | **P-value** |
| --- | --- | --- | --- |
| **POD 1** |  |  |  |
| Any rescue, n (%) | 14 (70.0) | 12 (60.0) | 0.741 |
| Opioid rescue, n (%) | 11 (55.0) | 6 (30.0) | 0.200 |
| Non-opioid rescue, n (%) | 9 (45.0) | 11 (55.0) | 0.752 |
| **POD 2** |  |  |  |
| Any rescue, n (%) | 6 (30.0) | 8 (40.0) | 0.741 |
| Opioid rescue, n (%) | 5 (25.0) | 5 (25.0) | >0.999 |
| Non-opioid rescue, n (%) | 4 (20.0) | 4 (20.0) | >0.999 |
| **POD 3** |  |  |  |
| Any rescue, n (%) | 7 (35.0) | 9 (45.0) | 0.748 |
| Opioid rescue, n (%) | 5 (25.0) | 5 (25.0) | >0.999 |
| Non-opioid rescue, n (%) | 2 (10.0) | 4 (20.0) | 0.661 |
| **Total (POD 1 to 3)** |  |  |  |
| Any rescue, n (%) | 15 (75.0) | 16 (80.0) | >0.999 |
| Opioid rescue, n (%) | 13 (65.0) | 10 (50.0) | 0.523 |
| Non-opioid rescue, n (%) | 12 (60.0) | 14 (70.0) | 0.741 |

Data are presented as n (%) or mean (SD). ESPB, erector spinae plane block; TEA, thoracic epidural analgesia; POD, postoperative day; OME, oral morphine equivalents.

# **Table S5.** Postoperative secondary outcomes and recovery parameters (Per protocol population)

| **Outcomes** | **ESP Group (n=20)** | **TEA Group (n=20)** | **Risk ratio (95% CI) Mean diff (95% CI) Median diff (95% CI)** | ***P*-value** |
| --- | --- | --- | --- | --- |
| Intraoperative remifentanil, μg | 1647.7 (580.9) | 1466.4 (586.0) | 181.4 (-192.2, 554.9) | 0.332 |
| **PACU** |  |  |  |  |
| Rescue analgesia | 16 (69.6%) | 9 (42.9%) | 1.62 (0.92, 2.85) | 0.127 |
| PONV | 1 (4.3%) | 3 (14.3%) | 0.30 (0.03, 2.70) | 0.335 |
| Antiemetics use | 0 (0.0%) | 2 (9.5%) | 0.22 (0.01, 4.81) | 0.222 |
| **Recovery parameters** |  |  |  |  |
| POD 3 QoR-15 | 104.0 (25.0) | 105.4 (18.6) | -1.41 (-16.55, 13.73) | 0.85 |
| Chest tube duration | 4.0 [3.0–6.0] | 4.0 [1.0–5.0] | 1.0 (-1.0, 2.0) | 0.449 |
| Foley catheter duration | 19.2 [1.4–21.6] | 20.3 [2.3–24.5] | -1.5 (-15.1, 0.9) | 0.222 |
| Postoperative complications | 1 (4.3%) | 1 (4.8%) | 0.91 (0.06, 13.69) | >0.999 |
| Hospital stay (days) | 6.0 [5.0–9.5] | 7.0 [6.0–9.0] | -1.0 (-3.0, 1.0) | 0.413 |
| ICU care | 12 (52.2%) | 16 (76.2%) | 0.68 (0.43, 1.08) | 0.125 |
| ICU stay (days) | 1.0 [0.0–1.0] | 1.0 [1.0–1.0] | -0.0 (-1.0, 0.0) | 0.104 |
| Postoperative 3 mo FEV1, La | 2.11 (0.52) | 1.82 (0.47) | 0.30 (-0.03, 0.62) | 0.074 |
| **Adverse events** |  |  |  |  |
| Nausea | 3 (13.0%) | 3 (14.3%) | 0.91 (0.21, 4.04) | >0.999 |
| Vomiting | 0 (0%) | 1 (4.8%) | 0.45 (0.02, 12.96) | 0.477 |
| Hypotension | 0 (0%) | 2 (9.5%) | 0.22 (0.01, 4.81) | 0.222 |
| Respiratory depression | 0 (0%) | 0 (0%) | - | - |
| Urinary retention | 3 (13.6%) | 3 (14.3%) | 0.95 (0.22, 4.21) | >0.999 |

Data are presented as mean (standard deviation), median [interquartile range] or number (percentage). a: n=18 (ESPB group) and n=19 (TEA group).

PACU, post-anesthesia care unit; PONV, postoperative nausea and vomiting. ESPB, erector spinae plane block; TEA, thoracic epidural analgesia; POD, postoperative day; QoR-15, Quality of Recovery-15 score; ICU, intensive care unit.

# **Table S6**. Attrition Sensitivity Analyses for 3- and 6-Month Outcomes (mITT Population)

| **Outcome / Scenario** | **ESPB (n=23)** | **TEA (n=21)** | **Difference (95% CI)** | **P-value** |
| --- | --- | --- | --- | --- |
| **3-Month painDETECT** |  |  |  |  |
| Complete-case (n=18+19) | 28.1 (9.1) | 28.2 (14.3) | -0.1 (-8.1, 7.9) | 0.980 |
| Best-case for ESPBᵃ | 24.4 (10.8) | 31.0 (16.3) | -6.7 (-15.2, 1.9) | 0.114 |
| Worst-case for ESPBᵇ | 34.6 (14.9) | 26.6 (14.5) | 8.0 (-0.9, 17.0) | 0.078 |
| Mean imputationᶜ | 28.1 (8.0) | 28.2 (13.6) | -0.1 (-7.0, 6.8) | 0.976 |
| **6-Month painDETECT** |  |  |  |  |
| Complete-case (n=18+19) | 19.5 (9.5) | 20.3 (12.1) | -0.8 (-8.1, 6.4) | 0.822 |
| Best-case for ESPBᵃ | 17.0 (9.6) | 23.2 (14.8) | -6.2 (-14.0, 1.5) | 0.101 |
| Worst-case for ESPBᵇ | 26.3 (15.7) | 19.1 (12.1) | 7.2 (-1.3, 15.7) | 0.098 |
| Mean imputationᶜ | 19.5 (8.3) | 20.3 (11.5) | -0.8 (-7.0, 5.4) | 0.788 |
| **3-Month Analgesics Use** |  |  |  |  |
| Complete-case (n=21+20) | 3/21 (14.3%) | 7/20 (35.0%) |  | 0.159 |
| Best-case for ESPBᵃ | 3/23 (13.0%) | 8/21 (38.1%) |  | 0.083 |
| Worst-case for ESPBᵇ | 5/23 (21.7%) | 7/21 (33.3%) |  | 0.504 |
| **6-Month Analgesics Use** |  |  |  |  |
| Complete-case (n=21+20) | 3/21 (14.3%) | 6/20 (30.0%) |  | 0.277 |
| Best-case for ESPBᵃ | 3/23 (13.0%) | 7/21 (33.3%) |  | 0.155 |
| Worst-case for ESPBᵇ | 5/23 (21.7%) | 6/21 (28.6%) |  | 0.732 |

**Baseline Characteristics: Completers vs Non-completers (6-month follow-up)**

| **Characteristic** | **Completers (n=37)** | **Non-completers (n=7)** | **P-value** |
| --- | --- | --- | --- |
| Age, years | 66.3 (8.7) | 68.7 (7.7) | 0.495 |
| BMI, kg/m² | 24.1 (2.7) | 24.1 (2.9) | 0.969 |
| Operation time, min | 183.6 (54.0) | 182.1 (64.5) | 0.948 |
| Preoperative QoR-15K | 141.8 (11.9) | 141.3 (15.9) | 0.919 |
| Group, ESPB/TEA | 18/19 | 5/2 | 0.416 |

Data are presented as mean (SD) or n/N (%).

painDETECT data: P-values by Student's t-test. Analgesics use: P-values by Fisher's exact test.

ᵃ Best-case for ESPB: missing ESPB values imputed with lowest observed score (painDETECT) or no analgesic use; missing TEA values imputed with highest observed score or analgesic use.

ᵇ Worst-case for ESPB: missing ESPB values imputed with highest observed score or analgesic use; missing TEA values imputed with lowest observed score or no analgesic use.

ᶜ Mean imputation: missing values replaced with the group-specific observed mean.

ESPB, erector spinae plane block; TEA, thoracic epidural analgesia; QoR-15K, Korean version of Quality of Recovery-15.

# **Table S7**. Post-hoc Power Analysis for Non-inferiority Trial

**A. Original vs. Achieved Study Parameters**

| **Parameter** | **Original Calculation** | **Achieved Study** |
| --- | --- | --- |
| **Sample size calculation** |  |  |
| Non-inferiority margin (Δ) | 2.0 points | 2.0 points |
| Assumed standard deviation | 3.0 points | — |
| Effect size (Cohen's d) | 0.667 | — |
| Target power | 80% | — |
| One-sided alpha | 0.05 | 0.05 |
| Required sample size per group | 28 | — |
| Required total N | 56 | — |
| **Actual enrollment** |  |  |
| ESPB group | — | 23 (82% of target) |
| TEA group | — | 21 (75% of target) |
| Total N | — | 44 (79% of target) |
| **Observed data (POD1 NRS)** |  |  |
| Mean ± SD (ESPB) | — | 4.22 ± 1.93 |
| Mean ± SD (TEA) | — | 4.81 ± 1.78 |
| Mean difference | — | -0.59 |
| Observed pooled SD | — | 1.86 (38% lower than assumed) |
| Observed effect size | — | 1.077 |

**B. Post-hoc Power Results**

| **Scenario** | **SD** | **Effect Size (d)** | **Sample Size** | **Achieved Power** | **% of Target Power** |
| --- | --- | --- | --- | --- | --- |
| Original plan | 3.0 | 0.667 | N=56 (28 per group) | 80.0% | 100% (target) |
| Achieved N with assumed SD | 3.0 | 0.667 | N=44 (23 vs 21) | 52.3% | 65% |
| Achieved N with observed SD | 1.86 | 1.077 | N=44 (23 vs 21) | 64.7% | 81% |

CI, confidence interval; ESPB, erector spinae plane block; mITT, modified intention-to-treat; N, sample size; NRS, numeric rating scale; POD, postoperative day; SD, standard deviation; TEA, thoracic epidural analgesia.

# **Table S8**. Bayesian Analysis of Non-inferiority

**A. Model Specification and Convergence**

| **Component** | **Specification/Result** |
| --- | --- |
| **Model specification** |  |
| Outcome | Resting NRS pain score, postoperative day 1 |
| Model | Gaussian linear regression: NRS ~ Treatment |
| Software | brms 2.20.1 (R 4.3.0), Stan 2.32.0 |
| **Prior distributions** |  |
| Treatment effect (β₁) | Normal(0, 5) - weakly informative |
| Intercept (β₀) | Normal(5, 5) |
| Residual SD (σ) | Half-Cauchy(0, 5) |
| **MCMC sampling** |  |
| Chains | 4 parallel chains |
| Iterations | 4,000 per chain (2,000 warmup + 2,000 sampling) |
| Total posterior samples | 8,000 |
| **Convergence diagnostics** |  |
| R̂ (all parameters) | 1.00 (excellent) |
| Effective sample size | >3,500 for all parameters (excellent) |

**B. Posterior Distribution for Treatment Effect (ESPB minus TEA)**

| **Statistic** | **Value (NRS points)** |
| --- | --- |
| **Point estimates** |  |
| Posterior mean | -0.58 |
| Posterior median | -0.58 |
| **Uncertainty** |  |
| 95% Credible Interval | -1.69 to 0.52 |
| Posterior SD | 0.55 |
| **Comparison with frequentist** |  |
| Frequentist mean difference | -0.59 |
| Frequentist 95% CI | -1.72 to 0.54 |
| Agreement | Near-identical |

**C. Posterior Probabilities for Clinical Questions**

| **Clinical Question** | **Posterior Probability** | **Interpretation** |
| --- | --- | --- |
| P(ESPB better than TEA) P(difference < 0) | 72.3% | Moderate probability ESPB provides lower pain |
| P(TEA better than ESPB) P(difference > 0) | 27.7% | Lower probability TEA is superior |
| P(clinically equivalent) P(|difference| < 1.0) | 83.9% | High probability of close equivalence |
| P(non-inferior at Δ=2.0) P(difference < 2.0) | >99.9% | Overwhelming evidence for non-inferiority |
| P(non-inferior at Δ=1.5) | 98.6% | Non-inferiority at more stringent margin |
| P(non-inferior at Δ=1.0) (conservative MCID) | 91.8% | Strong evidence even at 1-point margin |

**D. Sensitivity to Prior Specification**

| **Prior for Treatment Effect** | **Posterior Mean** | **95% CrI** | **P(Non-inferior at Δ=2.0)** |
| --- | --- | --- | --- |
| Weakly informative: N(0, 5) | -0.58 | -1.69 to 0.52 | >99.9% |
| More informative: N(0, 2) | -0.57 | -1.66 to 0.51 | >99.9% |
| Less informative: N(0, 10) | -0.58 | -1.70 to 0.53 | >99.9% |
| Skeptical: N(2, 3) | -0.32 | -1.42 to 0.78 | 98.2% |

CI, confidence interval; CrI, credible interval; ESPB, erector spinae plane block; MCID, minimal clinically important difference; MCMC, Markov Chain Monte Carlo; mITT, modified intention-to-treat; NRS, numeric rating scale; POD, postoperative day; SD, standard deviation; TEA, thoracic epidural analgesia.

# **Figure S1**. Resting pain scores over time in Per Protocol population.

Box plots showing numeric rating scale (NRS) pain scores at rest from postoperative day (POD) 1 morning through POD 3 evening. Box plots display the median (center line), interquartile range (box), and upper and lower whiskers are the maximum and minimum values, respectively. Dots show the individual data points. ESPB, erector spinae plane block; TEA, thoracic epidural analgesia.


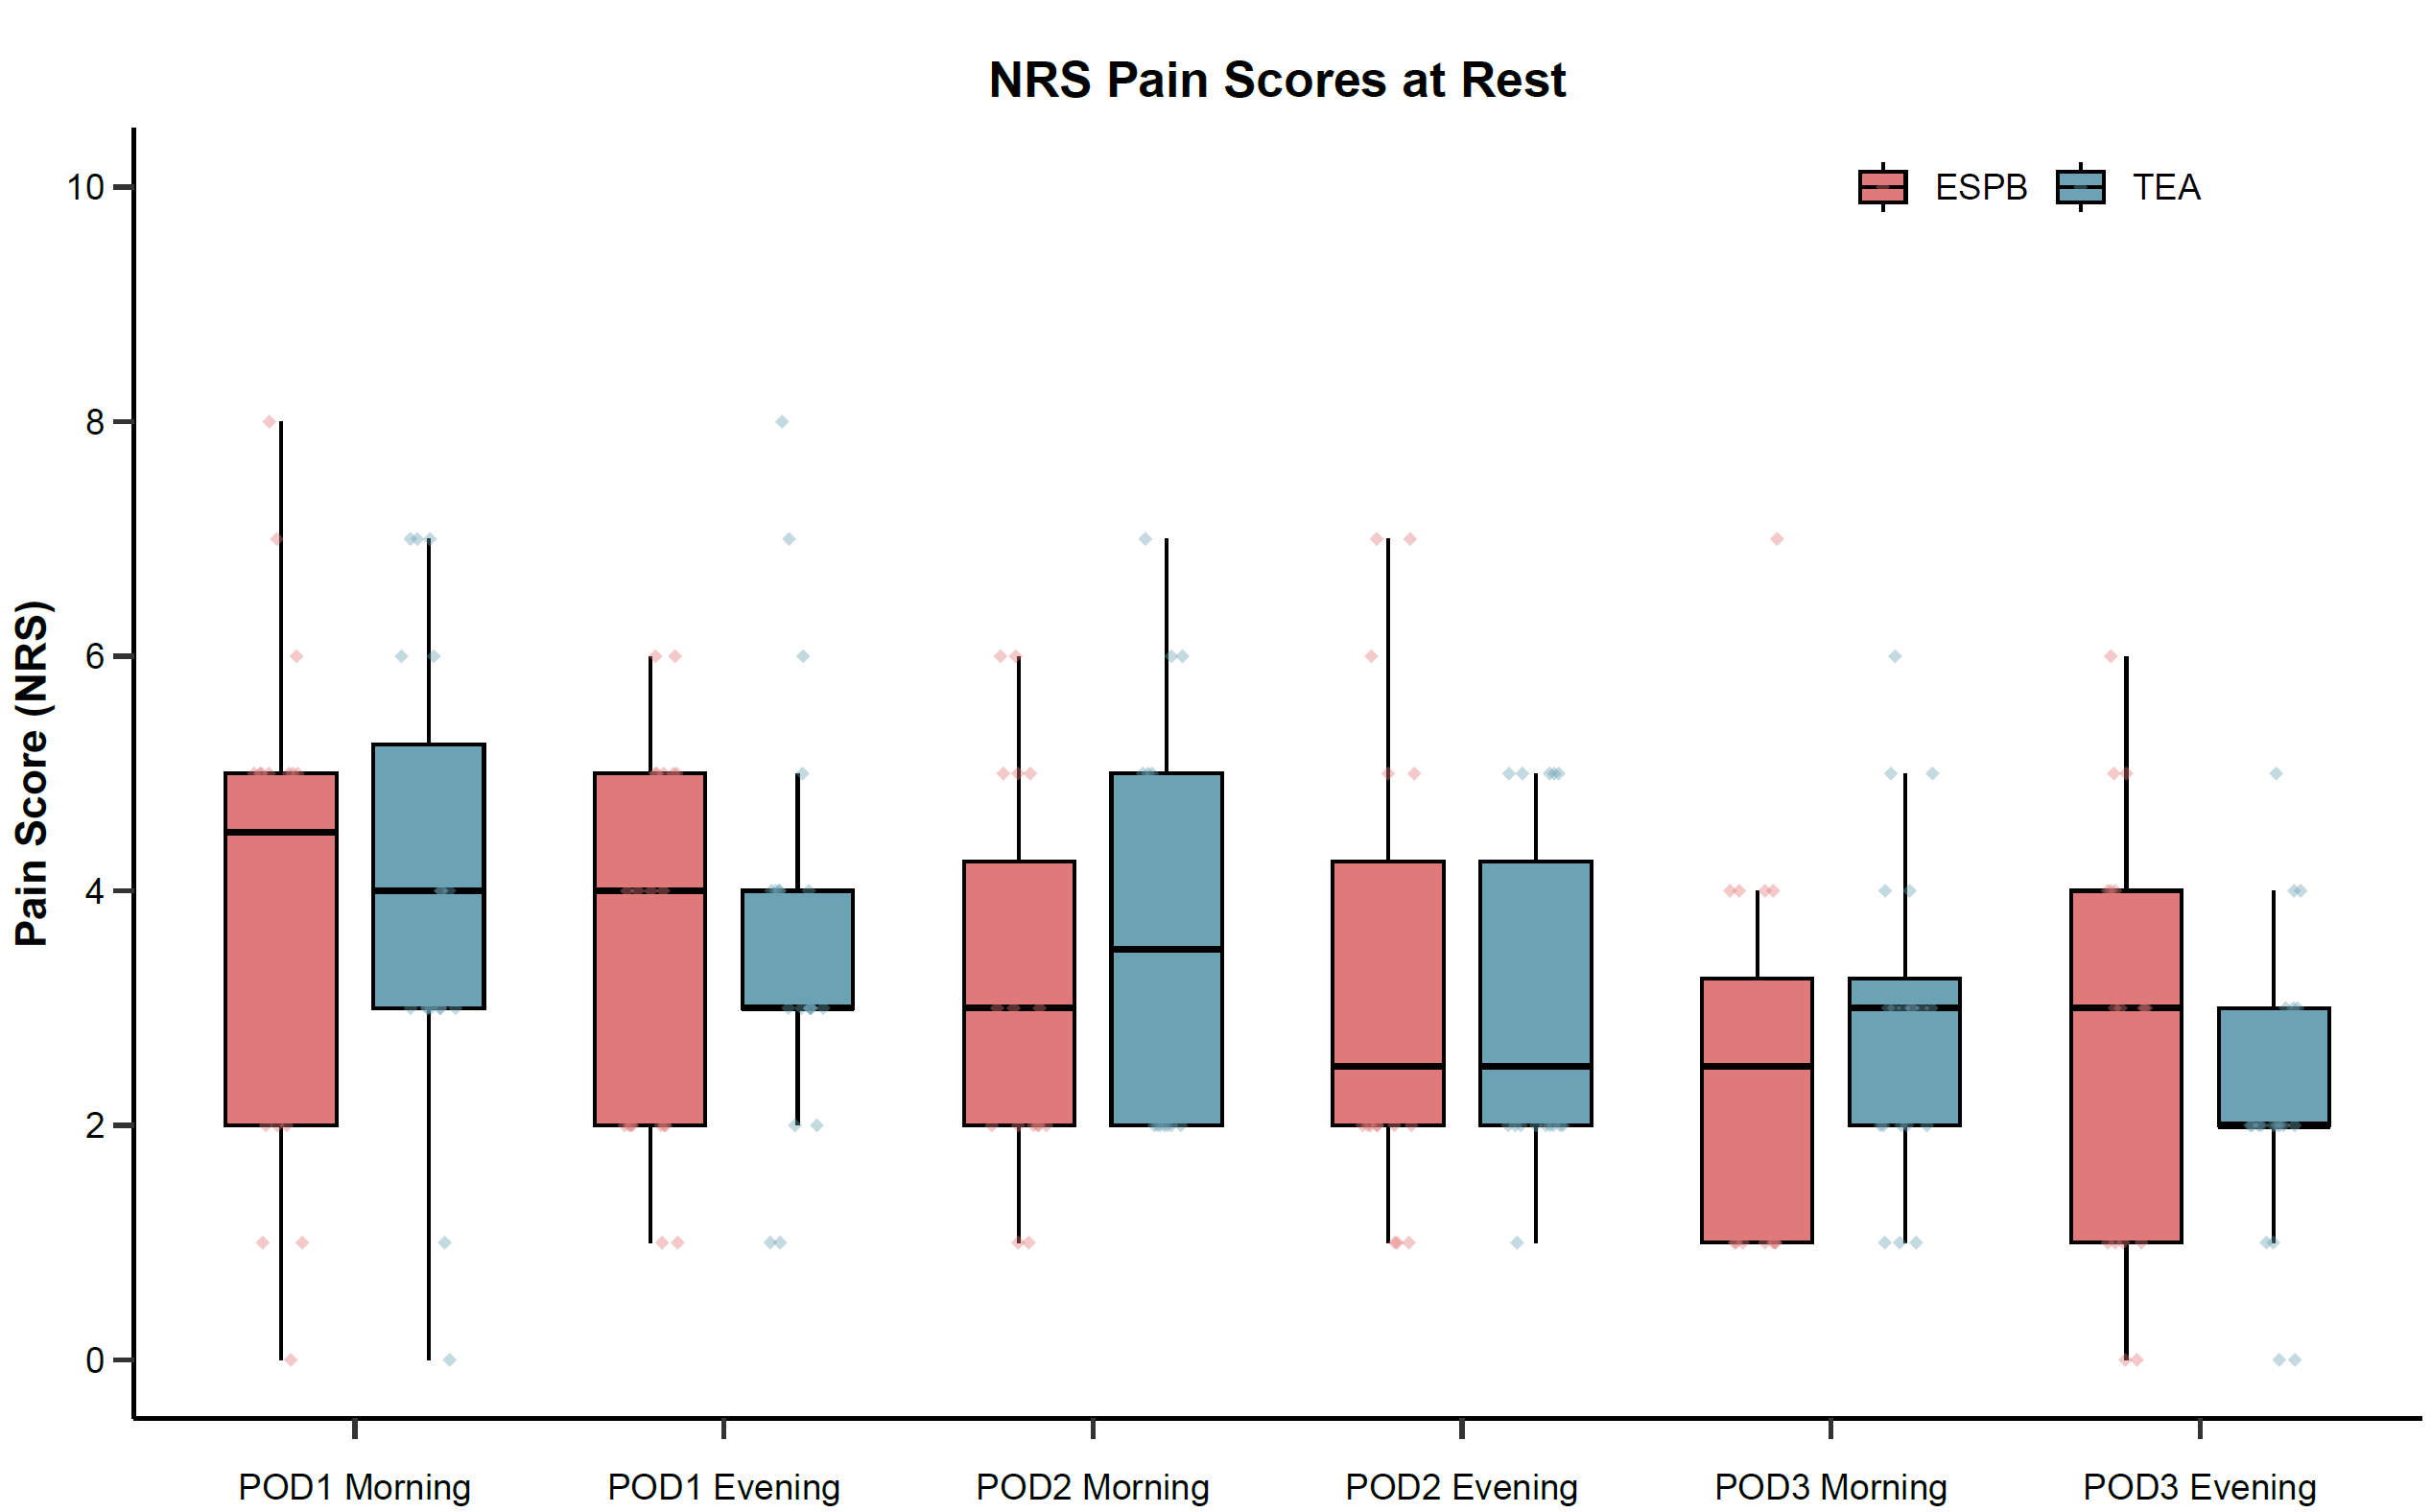

Supplement: Supplementary file 1 [file 585519%20Revised%20Supplementary%20Materials.docx]
